# Supplementary material for: Simultaneous adsorption of Cd(ii) and phosphate on Al13 pillared montmorillonite
Source: Royal Society of Chemistry journal article supplement (doi:10.1039/c5ra15744g), 2015-01-01
Supplement: c5ra15744g1.pdf [file c5ra15744g1.pdf]

## Simultaneous adsorption of Cd(II) and phosphate on Al<sub>13</sub> pillared montmorillonite

Lingya Ma<sup>a,b,c</sup>, Jianxi Zhu<sup>a,d</sup>, Yunfei Xi<sup>b\*</sup>, Runliang Zhu<sup>a,d</sup>, Hongping He<sup>a,d\*</sup>, Xiaoliang Liang<sup>a,d</sup>  
Godwin A. Ayoko<sup>b</sup>

### Supplementary material

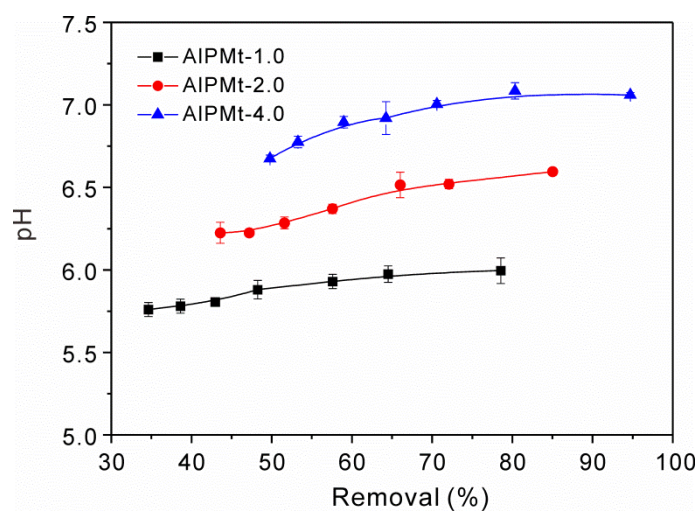

**Fig. S1** Correlations between the removal of phosphate by AlPMt and the equilibrium pH in the single adsorption system. The initial pH of solutions is pH 5.0.
